# Supplementary material for: Title Novel Insights into the Neuroprotective Attributes of Polyamines in Selected Edible and Medicinal Fungi: A Pioneering Report
Source: Preprints.org preprint supplement (doi:10.20944/preprints202311.1948.v1), 2023-11-30
Supplement: Supplementary file 1 [file supplementary]

**Table S1.** Results of CHN analysis.

|  | N (%) | C (%) | H (%) |
| --- | --- | --- | --- |
| *Acetanilide* | 10.322±1.52 | 70.728±4.25 | 6.671±0.85 |
| *Clitocybe odora* | 6.352±0.85 | 39.833±3.33 | 7.058±1.05 |
| *Clitopilus prunulus* | 7.472±0.66 | 38.961±2.95 | 6.850±0.94 |
| *Lepista nuda* | 7.585±0.94 | 39.317±2.38 | 6.930±1.12 |
| *Postia caesia* | 2.979±0.13 | 40.830±3.01 | 6.751±1.35 |
| *Morchella elata* | 5.539±0.51 | 37.860±2.77 | 6.647±0.98 |
| *Cyclocybe aegerita* | 4.843±0.37 | 39.979±2.89 | 6.996±0.85 |
| *Ganoderma applanatum* | 2.759±0.35 | 42.669±2.91 | 6.035±1.45 |
| *Ganoderma resinaceum* | 2.182 | 40.373 | 6.210 |
